1 **Article Type:** Original Article

2 **Running Title:** Chronosequence of invasion

3

4 **Chronosequence of invasion reveals minimal losses of population genomic diversity,**  
5 **niche expansion, and trait divergence in the polyploid, leafy spurge**

6

7 Thomas A. Lake<sup>1</sup>, Ryan D. Briscoe Runquist<sup>1</sup>, Lex E. Flagel<sup>12</sup>, and David A. Moeller<sup>1</sup>

8

9 **Affiliations**

10 <sup>1</sup> Department of Plant and Microbial Biology, University of Minnesota, St. Paul, Minnesota, USA

11 <sup>2</sup> Gencove, Long Island City, New York, USA

12

13 **Emails and ORCID**

14 Thomas Lake: lakex055@umn.edu, 0000-0002-8836-5164

15 Ryan Briscoe Runquist: rbriscoe@umn.edu, 0000-0001-7160-9110

16 Lex Flagel: flag0010@umn.edu, 0000-0003-2106-4196

17 David Moeller: moeller@umn.edu, 0000-0002-6202-9912

18

19 **Correspondence**

20 Thomas A. Lake and David A. Moeller

21 Department of Plant and Microbial Biology, University of Minnesota, St. Paul, Minnesota, USA

22 Email: lakex055@umn.edu, moeller@umn.edu

23

24 **Acknowledgments**

25 Funding was provided by the Minnesota Invasive Terrestrial Plants and Pests Center through  
26 the Environment and Natural Resources Trust Fund as recommended by the Legislative-Citizen

27 Commission on Minnesota Resources. The Minnesota Supercomputing Institute provided  
28 computing and data storage resources. We thank Yaniv Brandvain and Ken Kozak for

29 discussions and advice on analyses. We also thank Danielle Schoenecker, Ben Greene, and  
30 Isaac Olson for their assistance with data collection.

31

32

33

34

35 **ABSTRACT**

36 Rapid evolution may play an important role in the range expansion of invasive species  
37 and modify forecasts of invasion, which are the backbone of land management strategies.  
38 However, losses of genetic variation associated with colonization bottlenecks may constrain trait  
39 and niche divergence at leading range edges. The spatial and temporal scales over which  
40 adaptation contributes to invasion dynamics remains unresolved. We leveraged detailed records  
41 of the ~130 year invasion history of the invasive polyploid plant, leafy spurge (*Euphorbia*  
42 *virgata*), across ~500km in Minnesota, U.S.A. We examined the consequences of range  
43 expansion for population genomic diversity, niche breadth, and the evolution of germination  
44 behavior. Using genotyping-by-sequencing, we found some population structure in the range  
45 core, where introduction occurred, but panmixia among all other populations. Range expansion  
46 was accompanied by only modest losses in sequence diversity, with small, isolated populations  
47 at the leading edge harboring similar levels of diversity to those in the range core. The climatic  
48 niche expanded during most of range expansion, and the niche of the range core was largely  
49 non-overlapping with the invasion front. Ecological niche models indicated that mean  
50 temperature of the warmest quarter was the strongest determinant of habitat suitability and that  
51 populations at the leading edge had the lowest habitat suitability. Guided by these findings, we  
52 tested for rapid evolution in germination behavior over the time course of range expansion using  
53 a common garden experiment and temperature manipulations. Germination behavior diverged  
54 from early to late phases of the invasion, with populations from later phases having higher  
55 dormancy at lower temperatures. Our results suggest that trait evolution has contributed to  
56 niche expansion during invasion and that distribution models of future invasion may  
57 underestimate invasion potential without accounting for evolution.

58

59 **Key Words (6):** adaptation, colonization bottlenecks, plant invasion, population genetic  
60 structure, range shift, rapid evolution



## 62 **Introduction**

63 Invasive species experience considerable changes to genetic variation during the  
64 process of introduction and subsequent invasion (Lee 2002; Suarez and Tsutsui 2008). In  
65 particular, it has been well-documented that founder effects and genetic drift can cause  
66 substantial losses of genetic diversity during the colonization process (Dlugosch and Parker  
67 2008; Uller and Leimu 2011). Following initial establishment, further losses of variation may  
68 occur during range expansion. However, the magnitude of changes in genetic variation depends  
69 upon the number of introductions and the severity of population bottlenecks (Nei et al. 1975;  
70 Uller and Leimu 2011; Welles and Dlugosch 2019). Such changes in genetic variation early in  
71 the invasion process may influence the capacity for adaptation, forecasts of range expansion,  
72 and subsequent management decisions.

73 Following colonization, some non-native species exhibit rapid population growth and  
74 dispersal into new environments (Sakai et al. 2001). The process of invasion is often highly  
75 variable, involving repeated founder events and density-dependent population growth,  
76 especially Allee effects (Melbourne and Hastings 2009; Sullivan et al. 2017). In addition to  
77 affecting the speed of invasion, these population fluctuations can influence levels of genetic  
78 diversity and structure across an invaded range (Austerlitz et al. 1997; Excoffier 2004). For  
79 example, range expansion is expected to cause a reduction in allelic richness and  
80 heterozygosity with increasing distance from the origin of expansion (Slatkin and Excoffier 2012;  
81 Peter and Slatkin 2013). The prevalence of drift during invasion may also cause populations to  
82 depart from migration-drift equilibrium, resulting in a lack of isolation-by-distance (Wright 1943;  
83 Slatkin 1987, 1993; Hutchison and Templeton 1999). Last, mutations arising at the range edge  
84 may rise in frequency due to genetic drift, “surf” along the expanding front, and travel long  
85 distances (Klopfstein et al. 2006; Excoffier and Ray 2008). Models of allele surfing indicate that  
86 rapid range expansion can produce clinal variation in allele frequencies and increase the  
87 frequency of loci with private alleles (Klopfstein et al. 2006; Excoffier and Ray 2008; Goodsmann

88 et al. 2014). Such clines can emerge for any type of mutation (beneficial, neutral, deleterious),  
89 and therefore could reflect drift and/or selection (Lehe et al. 2012; Peischl et al. 2013; Koski et  
90 al. 2019). Overall, the prevalence of drift during range expansion has the potential to influence  
91 the capacity for adaptation as organisms encounter novel environments, particularly when  
92 functionally-important allelic variation is lost.

93 An increasing body of evidence suggests that rapid phenotypic evolution can be  
94 important to the process of range expansion (Colautti and Barrett 2013; Hodgins et al. 2018;  
95 Selechnik et al. 2019; Ma et al. 2020). Forecasts of range expansion in invasive species can  
96 underpredict the potential extent of invasion if they assume a species does not evolve or adapt  
97 over short time scales (Chardon et al. 2020; Collart et al. 2020). A recent meta-analysis  
98 indicated that the signature of local adaptation in invasive species was at least as strong as in  
99 native species, even when accounting for variation in life history (Oduor et al. 2016). Invasive  
100 species frequently expand across strong environmental gradients and into novel niche space  
101 (Atwater et al. 2018; Bates and Bertelsmeier 2021). Such niche expansion may require adaptive  
102 evolution at the invasion front (Chown et al. 2015; Moran et al. 2017; Hodgins et al. 2018). For  
103 example, purple loosestrife rapidly diverged in flowering time and plant size during invasion  
104 across latitudinal gradients in growing season length (Colautti and Barrett 2013). Despite  
105 evidence of rapid evolution in some systems, range expansion may not involve any changes in  
106 the organism's niche if the only limit to spatial expansion is dispersal and time. As such, the  
107 apparent expansion of the climate niche with invasion may not actually involve the evolution of  
108 ecologically-important traits. While tests of local adaptation within an invaded range remain few,  
109 there is growing appreciation that rapid evolution is likely to shape the trajectory of range  
110 expansion in non-native species (Hodgins et al. 2018; Woods and Sultan 2022).

111 Phenotypic evolution during range expansion may be caused by spatially-variable  
112 selection and/or neutral processes (e.g., spatial sorting) (Keller and Taylor 2008; Colautti and  
113 Lau 2015; Hodgins et al. 2018). Adaptive evolution, in particular, may be paramount to the

114 invasion process if selection in response to novel environments results in trait changes that  
115 enhance a species' capacity to establish in new habitats (Prentis et al. 2008; Williams et al.  
116 2016; Hodgins et al. 2018; Woods and Sultan 2022). While reciprocal transplant experiments  
117 are the gold standard for testing for adaptation, the translocation of invasive species for these  
118 experiments is subject to ethical concerns and legal restrictions in many areas. Alternatively,  
119 researchers have started to use ecological niche models (ENMs) to identify important  
120 environmental gradients that span from optimal to marginal habitat, such as from a range core  
121 to edge. Predictions are then made about traits that may promote adaptation to the novel  
122 environments found in marginal habitats (Searcy and Shaffer 2016; Dixon and Busch 2017;  
123 Capblancq et al. 2020; Morente-López et al. 2022). Finally, common garden experiments can  
124 determine whether the putative traits under selection have differentiated across the key  
125 environmental gradients identified by ENMs. Taken together, this series of approaches can  
126 provide insight into the role of adaptation in the process of niche expansion at leading range  
127 edges.

128         Among invasive plant species, polyploidy is prevalent (Pandit et al. 2011) and can  
129 influence the process of range expansion (Van de Peer et al. 2021). The frequency of polyploid  
130 species increases with higher latitudes, lower temperatures, and seasonally drier environments  
131 (Brochmann et al. 2004; Rice et al. 2019). Direct effects of polyploidy on physiological,  
132 morphological, and phenological traits may facilitate niche shifts (Glennon et al. 2014; Blaine  
133 Marchant et al. 2016; Brittingham et al. 2018; Wang et al. 2022) and preadapt polyploids to new  
134 environments (Treier et al. 2009; Lachmuth et al. 2010). Polyploidy may also influence the  
135 capacity for adaptation during range expansion as new environments are encountered (te Beest  
136 et al. 2012; Baniaga et al. 2020). Although genetic drift during range expansion can cause  
137 losses of genetic diversity, drift may have less severe effects (e.g., inbreeding depression) in  
138 polyploids relative to diploids when there is polysomic inheritance (Moody et al. 1993; Soltis and  
139 Soltis 2000). Despite numerous polyploid invaders, they have been the subject of few studies

140 because of substantial challenges with the application of evolutionary genetic analyses that  
141 were developed for diploids (Rutland et al. 2021).

142 In this study, we used a well-documented chronosequence of invasion to examine the  
143 consequences of range expansion for population genomic diversity, climatic niche breadth, and  
144 the evolution of germination behavior in the polyploid, leafy spurge (*Euphorbia virgata*). We  
145 focused on one area of introduction to southwestern Minnesota, U.S.A and subsequent range  
146 expansion to the north and east. We were interested in examining the severity of losses of  
147 genetic diversity following introduction and its potential consequences for invasion, particularly  
148 since existing species distribution models predict a low probability of range expansion at the  
149 current leading range edge (Lake et al. 2020). Introduction to this region occurred in the 1890s  
150 in southwestern Minnesota with subsequent range expansion to northeastern Minnesota (ca.,  
151 500 km), where populations are currently rare, isolated, and small. Based on historical  
152 occurrence datasets, we defined a range core, area of early expansion, area of late expansion,  
153 and invasion front.

154 First, we sampled populations along the gradient from core to invasion front using two  
155 sampling schemes to quantify population genomic diversity and structure (using reduced  
156 representation sequencing). Samples of multiple individuals from 14 populations (population  
157 samples) allowed us to quantify changes in sequence diversity among populations over the  
158 course of range expansion. Samples of single individuals from 157 populations (landscape  
159 samples) allowed us to test for fine-scale population structure (e.g., isolation-by-distance) over  
160 the time series of range expansion. Second, we tested whether range expansion involved niche  
161 expansion - i.e., occurred into novel climatic environments. Third, we developed an ecological  
162 niche model (ENM) to test whether habitat suitability declines from range core to invasion front  
163 and to determine which environmental gradients are most strongly associated with high versus  
164 low habitat suitability. Warm season temperature had the greatest positive contribution to  
165 habitat suitability. Because temperature is known to modulate germination behavior in leafy

166 spurge, and because establishment in new habitats is dependent upon successful germination  
167 timing, we focused on this trait for common garden experiments. Past work has also suggested  
168 that shifts in seed dormancy might facilitate invasion at leading range edges (Mathias and Kisd  
169 2002; Travis et al. 2021). We examined the responses of seeds from early versus late in  
170 invasion to five temperature regimes in a common garden experiment. We specifically tested  
171 whether there was an interaction between geographic region (early vs. late invasion stages) and  
172 temperature regime, which would indicate divergence in germination behavior over the course  
173 of invasion.

174

## 175 **Methods**

### 176 **Biology and invasion of leafy spurge**

#### 177 **Species biology**

178 Leafy spurge has invaded nearly two million acres across the northern tier of the United  
179 States and southern Canada (Duncan et al. 2004). While it is most commonly found in dry, open  
180 sites with well-drained soils (e.g., prairies), it can occasionally occur in seasonally wet meadows  
181 and riparian areas (Selleck et al. 1962). Leafy spurge impacts rangelands and natural habitats  
182 by competitively displacing native species (Hein and Miller 1992). When damaged, plants exude  
183 a toxic white latex that deters grazing (Lym and Kirby 1987; Lym 1998).

184 Leafy spurge spreads locally via rhizomes and ballistic seed dispersal (Morrow 1979).  
185 Longer distance dispersal has been proposed to occur via animals or agricultural machinery  
186 (Pemberton 1988; Lacey et al. 1992). Seeds germinate in spring or may remain dormant in soil  
187 for at least two years (Hanson and Rudd 1933; Selleck et al. 1962). Flowers are insect  
188 pollinated and the mating system is primarily outcrossing (Selleck et al. 1962).

189 Leafy spurge is an auto-allohexaploid that likely originated from hybridization between  
190 closely-related *Euphorbia* species, although the progenitor species are not yet known (Schulz-  
191 Schaeffer and Gerhardt 1989; Riina et al. 2013). It has been the subject of several genomic



192 investigations but lacks a full genome assembly and annotation (Chao et al. 2005; Horvath et al.  
193 2015, 2018; West et al. 2023).

194

## 195 **Invasion history**

196 One introduction of leafy spurge occurred into southwestern Minnesota ca., 1890  
197 purportedly via contaminated grains imported from southern Russia (Batho 1932; Hanson and  
198 Rudd 1933; Dunn 1985). Following introduction, the range expanded to eastern South Dakota  
199 by ca., 1902 (Bakke 1936), eastern North Dakota by ca. 1909 (Hanson and Rudd 1933), and  
200 southern Manitoba and Saskatchewan by the 1920s (Batho 1932; Selleck et al., 1962). Hanson  
201 and Rudd (1933) documented in detail the distribution of leafy spurge across Minnesota and  
202 neighboring regions, providing a baseline for understanding the timeline of subsequent range  
203 expansion. By the late 1970s, leafy spurge had become common throughout grasslands of the  
204 north-central plains (Dunn 1979, 1985). Invasion of the boreal forest region of northeastern  
205 Minnesota began in the 1940s and 1950s with isolated occurrences (Lakela 1965) and  
206 populations were not common until the 1990s. This invasion front has persisted with limited  
207 expansion further northeast.

208

## 209 **Delineating the timeline of range expansion**

210 We digitized the earliest known point record map (Hanson and Rudd 1933) using ArcGIS  
211 Pro (ESRI, 2022). We then applied empirical Bayesian kriging to produce a continuous density  
212 surface that represented the density of populations in the north-central plains. From this density  
213 surface, we applied an equal-interval threshold to demarcate a range core, area of early  
214 expansion, area of late expansion, and invasion front that corresponded to four density  
215 categories across Minnesota and surrounding states (Figure 1). We verified these demarcations  
216 with published accounts of the invasion history (described above).

217

## 218 **Population genetic diversity and structure**

### 219 **Sampling and sequencing**

220 In 2019, we collected leaf tissue from six individuals in each of 14 populations distributed  
221 evenly across Minnesota (*hereafter*: population samples; Figure 1A). In addition, we collected  
222 tissue from one individual in each of 157 populations distributed relatively evenly across  
223 Minnesota, eastern South Dakota, eastern North Dakota, and western Wisconsin (*hereafter*:  
224 landscape samples; Figure 1B). We sampled tissue from individuals that were at least five  
225 meters apart to minimize collecting from the same genet and placed tissues immediately in  
226 silica for preservation until DNA extraction (Table S1).

227 We extracted DNA using QIAGEN DNeasy Plant Mini Kits (QIAGEN Inc.). Dual-indexed  
228 GBS (genotyping-by-sequencing) libraries were created using the BamHI + NsiI enzyme  
229 combination. All libraries were pooled and sequenced on an Illumina NovaSeq System (Illumina  
230 Inc., San Diego, CA, USA) with 1x100-bp sequencing. Once sequenced, the reads were  
231 demultiplexed and balanced with a mean quality score  $\geq$  Q30 for all libraries. We filtered low-  
232 quality bases using Trimmomatic (Bolger et al. 2014) and used Stacks v.2.5.9 (Rochette et al.  
233 2019) to build loci *de novo* (i.e., without aligning reads to a reference genome). Overall, we  
234 obtained 510 million reads across the 241 samples (599,386 – 3,376,078 of raw reads per  
235 individual). Mean read depth per locus ranged from 14x to 26x (Supplementary Methods).

236 We called SNPs using polyRAD v.1.6 (Clark et al. 2019), a Bayesian algorithm designed  
237 for polyploid GBS data. PolyRAD estimates the genotype probabilities for each individual from  
238 read depth distributions with ploidy level as a prior. First, we filtered our dataset using the  
239  $H_{ind}/H_e$  statistic to cull likely paralogous loci (Clark et al. 2022). Next, we estimated posterior  
240 probabilities for each genotype using the 'IterateHWE' function with Hardy-Weinberg equilibrium  
241 as the prior (Gerard and Ferrão 2020; Clark et al. 2022). For each individual at each locus, we  
242 exported the most probable genotype for subsequent analyses (Supplementary Methods).

243 We implemented a second filtering step to account for potential biases caused by  
244 homoeologous loci present in our dataset. Because leafy spurge is an auto-allohexaploid  
245 (Schulz-Schaeffer and Gerhardt 1989), we expect homoeologous loci to have a 2:1 allelic ratio  
246 (e.g. AAAABB genotype; Horvath et al. 2018). Indeed, we identified a peak in the minor allele  
247 frequency spectrum around 0.33 (Figure S1). We removed loci with a minor allele frequency  
248 above 0.26 from our dataset because they are likely to have an excess of homoeologous  
249 genotypes (Figure S1). While essential, this second filtering step limits our capacity to  
250 understand absolute levels of sequence diversity. However, our primary goal was to examine  
251 changes in sequence diversity over the course of invasion rather than absolute quantities. After  
252 filtering, 3,176 loci remained for downstream analyses.

253

#### 254 **Population structure**

255 We performed an analysis of molecular variance (AMOVA) to quantify the proportion of  
256 genetic variation partitioned among populations, among individuals within populations, and  
257 within individuals (Excoffier et al. 1992; Meirmans 2012, 2020). We estimated genetic variance  
258 components using the rho statistic (Ronfort et al. 1998) and determined significance using  
259 permutation tests (n= 999) using the R package poppr v 2.8.6 (Kamvar et al. 2015). Further, we  
260 checked for clonality among samples using the 'clonecorrect' function in (Kamvar et al. 2015).

261 We assessed population structure using the Bayesian clustering algorithm STRUCTURE  
262 v.2.3.4 (Pritchard et al. 2000). We ran the analysis for 500,000 Markov Chain Monte Carlo  
263 iterations with a 50,000-run burn-in period, specifying an admixture model with the assumption  
264 of uncorrelated allele frequencies. We used 'structure\_threader' in Python 3 (Pina-Martins et al.  
265 2017) to parallelize runs across clusters (K = 1 – 10). We determined the most plausible number  
266 of clusters using the Evanno Delta K method (Evanno et al. 2005) and STRUCTURE  
267 HARVESTER web v.0.6.94 (Earl and vonHoldt 2012).

268 We performed principal component analyses (PCA) to examine population structure  
269 using GENODIVE v.3.0.4 (Meirmans 2020). We performed PCA separately for the population  
270 samples and the landscape samples.

271 We tested for isolation by distance (IBD) (Wright 1943) in the population samples by  
272 estimating genetic differentiation as  $G_{ST}$  (Dufresne et al. 2014) using GENODIVE v.3.0.4  
273 (Meirmans 2020). We also tested for IBD in the landscape samples by calculating Nei's genetic  
274 distance ( $D$ ) (Nei 1972) (Meirmans 2020). We subset the landscape samples according to  
275 successive stages of range expansion and tested for IBD within each subset (i.e., within range  
276 core, then successively including areas of early expansion, late expansion, and invasion front).  
277 We tested for a relationship between genetic and geographic distance matrices using Mantel  
278 tests with 9,999 permutations in the R package 'adegenet' v.2.1.8 (Jombart 2008).

279

#### 280 **Tests for changes in population genetic diversity during range expansion**

281 For each of the 14 population samples, we estimated observed heterozygosity ( $H_o$ ;  
282 gametic heterozygosity: which corrects for potential overestimates of heterozygosity in  
283 polyploids by calculating the fraction of heterozygotic gametes for each genotype) (Moody et al.  
284 1993), the inbreeding coefficient ( $G_{IS}$ ) (Meirmans et al. 2018), and the number of private alleles  
285 ( $P$ ) (Kamvar et al., 2014). We also estimated Tajima's  $D$  (Tajima 1989) using DNASp v 6.0  
286 (Rozas et al. 2017) to gauge if populations have an excess or deficit of rare alleles, which can  
287 be indicative of population expansion following a bottleneck (negative  $D$ ) or sudden population  
288 contraction (positive  $D$ ), respectively. Because we filtered loci with higher minor allele  
289 frequencies, Tajima's  $D$  should be biased to lower values.

290 We tested for changes in population genetic parameters ( $H_o$ ,  $G_{IS}$ ,  $P$ , and Tajima's  $D$ ) as  
291 populations dispersed beyond the range core (Table 1). For each statistic separately, we used a  
292 multiple linear regression that included latitude, longitude, and their interaction as independent  
293 variables with the R package 'car' (Weisberg, 2019). As all late expansion and invasion front

294 populations are located either north or east of the range core, latitude and longitude describe  
295 the northern and eastern invasion spread, respectively. In the model of private alleles, we  
296 identified the 'Winona' population as an outlier using diagnostic plots of residuals (Figure S2), so  
297 we removed it from the analysis.

298

## 299 **Niche breadth and habitat suitability**

### 300 **Environmental data**

301 We downloaded three bioclimatic variables at a 30 arcsecond resolution (~1 km) from  
302 Worldclim (<http://worldclim.org/version2>): minimum temperature of the coldest month (Bio 6),  
303 mean temperature of the warmest quarter (Bio 10), and precipitation of the warmest quarter (Bio  
304 16). These three variables provide biologically meaningful axes of climate variation that are  
305 relevant to key life history stages (Figure S3) (Petitpierre et al. 2017; Chapman et al. 2017).  
306 Specifically, minimum cold temperatures are important for plant physiological responses to  
307 overwintering and cold tolerance (Chapman et al. 2017), whereas the temperature of the  
308 warmest season acts on seed germination, plant growth, and phenological transitions  
309 (Wolkovich et al. 2013). Precipitation in the warmest season also affects plant growth and  
310 reproduction, with lower precipitation associated with reduced growth and increased drought  
311 stress in northern temperate ecosystems (Petitpierre et al. 2017; Gorton et al. 2019).

312

### 313 **Tests for niche differentiation during range expansion**

314 We tested for climatic niche differentiation between the range core, early expansion, late  
315 expansion, and invasion front using the 'ecospat' R package (Di Cola et al. 2017). We sampled  
316 the total extent of the background environmental space with a principal components analysis  
317 using 1500 random points drawn from a bounding box centered on Minnesota (Latitude: min:  
318 43°N, max: 50°N; Longitude: min: -98°W, max: -89°W). We then used the landscape sample

319 localities to calculate the niche boundaries and density of occurrence for each portion of the  
320 range within the environmental PCA space.

321 For all pairwise comparisons of the range core, early expansion, late expansion, and  
322 invasion front, we quantified four measures of niche differentiation. First, we used Schoener's  $D$   
323 to quantify the similarity in niche by incorporating both niche breadth and density (Warren et al.  
324 2008). Values of  $D$  can vary from 0 (no overlap) to 1 (complete overlap). For each pair of  
325 regions, we then calculated what proportion of the combined niche space represented niche  
326 stability, expansion, and unfilling. In this framework, if 'A' represents the older portion of the  
327 range (e.g. range core) and 'B' represents the more recent portion of the range (e.g. invasion  
328 front), niche stability is the proportion of niche B that overlaps A, niche expansion is the  
329 proportion of niche B that does not overlap A, and niche unfilling is the proportion niche A that  
330 does not overlap B.

331 We used permutation tests to determine if values of Schoener's  $D$ , expansion, stability,  
332 and unfilling were equivalent between the range core, early expansion, late expansion, and  
333 invasion front. In the niche equivalency tests, the data were pooled and then randomly assigned  
334 to one group of the pairwise range comparisons for 999 permutations. For each permutation, we  
335 computed all four statistics. We rejected the null hypothesis of niche equivalency if the observed  
336 Schoener's  $D$  value was less than 95% of permuted  $D$  values. Similarly, we rejected niche  
337 equivalency based on the combined niche space if observed stability was less than 95% of  
338 permuted values and observed niche expansion or unfilling was greater than 95% of permuted  
339 values.

340

### 341 **Ecological niche model**

342 We developed an ecological niche model (ENM) using MaxEnt v.3.4.3 (Merow et al.  
343 2013; Phillips et al. 2017) with the 'dismo' package in R (Hijmans et al. 2022). Our goal was  
344 identify environmental gradients that could potentially drive phenotypic evolution during range

345 expansion (Elith and Leathwick 2009; Araújo et al. 2019; Morente-López et al. 2022). We built  
346 ENMs with the same bioclimatic variables and in the same bounding box as the analyses of  
347 niche differentiation. We used occurrence records from our tissue collection sites and 10,000  
348 background points. We excluded threshold and hinge features during the model building  
349 process as the preliminary models that included these features tended to be overspecified. We  
350 used five-fold cross-validation to assess model performance; data were randomly partitioned  
351 into five equal groupings and 80% of data were used for training and 20% were used for  
352 evaluation. Model predictions are a mean of the five cross-validated models.

353 We evaluated models using AUC and sensitivity, which were calculated using the  
354 withheld dataset. AUC characterizes model discrimination ability and ranges between 0 and 1,  
355 with higher values indicating greater model performance and a value of 0.5 indicating that model  
356 discrimination is no better than random (Phillips and Dudík 2008). Sensitivity quantifies the  
357 proportion of correctly identified positives. We calculated sensitivity where the sum of the true  
358 positive rate and true negative rate was maximized (threshold = 0.53). We then used the  
359 variable permutation importance and percent contribution to identify which environmental  
360 variable had the greatest contribution to habitat suitability. We also visualized response curves  
361 of each environmental variable to ensure models were not overspecified.

362 To test for divergence in germination behavior during range expansion, we focused on  
363 warm season temperature since it most strongly affected predicted habitat suitability in the  
364 ENM. Populations from early in the invasion had high predicted habitat suitability and higher  
365 warm season temperatures (all above 20°C) compared to those from later in the invasion, which  
366 had lower predicted habitat suitability and lower warm season temperatures (all below 20°C;  
367 Fig. 6A,B). The other environmental variables in our ENM did not differ consistently between  
368 early versus late in invasion (Figure S5). Guided by these results, we divided the 14 populations  
369 for which we had seed collections into two groups: early (n=8) versus late (n=6) in invasion and  
370 exposed them to five temperature regimes (see below).

371

372 **Tests for differentiation in germination behavior during range expansion**

373 We collected seeds from 14 populations (8 – 24 maternal families/pop) in 2019 (Table  
374 S6). Seeds were collected from individuals that were at least 5 meters apart. We stored and  
375 after-ripened seeds in an indoor environment for two years prior to the germination experiment  
376 (Wicks and Derscheid 1958). Seeds were pooled within populations prior to applying  
377 treatments. We were unable to collect seeds from every population used in the population  
378 genetic survey because some had already dispersed seeds prior to our collection effort.

379 We examined the effects of temperature regime and source geographic region (early vs.  
380 late in invasion) on germination. Five temperature regimes were designed to mimic the full  
381 range of variation in daytime and nighttime temperatures during the spring and summer in this  
382 region (14 hour day /10 hour night periods: 15/5 °C, 20/10 °C, 25/15 °C, 30/20 °C, and 35/25  
383 °C). The experiment was conducted in five successive rounds in two growth chambers  
384 (Convion Inc.). We conducted each temperature regime twice – i.e., once in each growth  
385 chamber - to control for growth chamber effects.

386 For each round, we placed ten seeds per population in 60 x 15mm polystyrene Petri  
387 dishes containing 2 mL sterile distilled water, lined with one Whatman #1 filter paper, and  
388 sealed with parafilm. Each population was replicated three times per chamber for a total of 42  
389 dishes per treatment per chamber or 84 dishes per round. Dishes were wrapped in aluminum  
390 foil to block light, which can inhibit germination (Selleck et al., 1962). Every 24 hours we  
391 recorded the number of germinated seeds (emergence of radicle) per dish. After each treatment  
392 period ended, we tested whether ungerminated seeds were viable by soaking bisected seeds in  
393 a 1% Tetrazolium solution for 24 hours (Verma and Majee 2013). Red staining of tissues  
394 indicates that seeds are viable. For analyses of germination, we included the number of  
395 germinated seeds out of the total number of germinated plus viable (but ungerminated) seeds.



396 We tested for the effects of temperature regime (categorical), source geographic region,  
397 and their interaction on germination probability using a mixed-effects model with a binomial  
398 family. Experimental round and population were included as random effects. We evaluated  
399 significance with Type III tests. All models were run using the 'mixed' function in the 'afex'  
400 package (Singmann et al. 2016) in R v.4.0.2 (R Development Core Team, 2015). We used  
401 linear contrasts to test for differences in germination between geographic regions for each  
402 temperature regime category individually.

403

## 404 **Results**

### 405 **Population genetic consequences of range expansion**

406 Analysis of molecular variance (AMOVA) revealed significant partitioning of genetic  
407 variance among populations (13.7%;  $P < 0.001$ ), among individuals within populations (8.4%;  $P$   
408  $< 0.001$ ), and within individuals (77.8%;  $P < 0.001$ ) (Table S2). No clonal genotypes were  
409 detected in the dataset. STRUCTURE indicated that the optimal number of clusters was three  
410 ( $K = 3$ ) (Table S3). All individuals were assigned primarily to one cluster regardless of where the  
411 population was found in the invasive range (i.e., core, early expansion, late expansion, invasion  
412 front). There was some evidence of population structure in the other two clusters; however,  
413 there was no clear geographic pattern (Figure 2).

414 The PCA did not indicate substantial population structure across the invaded range  
415 based on either population or landscape samples. For the population samples, there was some  
416 evidence of differentiation among three populations in or near the range core (Figure 3; PC1  
417 and PC2 explained: 6.8% and 5.9% of variance, respectively). The PCA of landscape samples  
418 did not reveal a relationship between genetic similarity and geography over the time course of  
419 range expansion (Figure 3; PC1 and PC2 explained 1.7% and 1.3% of variance, respectively).

420 There was no evidence of isolation by distance (IBD) for either population ( $R^2 = 0.02$ ;  $P$   
421  $= 0.418$ ; Table 2; Table S4) or landscape samples ( $R^2 = 0.05$ ;  $P = 0.676$ ; Table S4). We also did

422 not detect IBD when landscape samples were subset according to the four invasion phases that  
423 we defined (Figure 4).

424 Range expansion from the core area of invasion was accompanied by only modest  
425 changes in genetic diversity. Heterozygosity declined modestly from the core to the invasion  
426 front, as indicated by a significant interaction of latitude and longitude ( $P = 0.013$ ; Table 3).  
427 However, the number of private alleles, Tajima's  $D$ , and the inbreeding coefficient did not  
428 change over the course of range expansion (Table 3).

429

### 430 **Niche differentiation during range expansion**

431 The climatic niche expanded during invasion. Relative to the range core, the early  
432 expansion niche represented a sizable increase in niche breadth (Figure 5A; Table S5; overlap  
433 = 0.43;  $P < 0.01$ ; expansion = 0.37;  $P < 0.01$ ; stability = 0.63;  $P < 0.01$ ). When comparing the  
434 early expansion and late expansion niches, there was similar evidence for a niche shift (Figure  
435 5B; Table S5; overlap = 0.36,  $P < 0.01$ ; expansion = 0.39,  $P < 0.01$ ; stability = 0.61,  $P < 0.01$ ).  
436 Between the late expansion niche and the invasion front, the null hypothesis of niche  
437 equivalency was not rejected (Table S5); the invasion front niche was contained within the late  
438 expansion niche (Figure 5C). When comparing range core to invasion front, there was near-zero  
439 niche overlap (Figure 5D; Table S5; overlap = 0.03,  $P < 0.01$ ; stability = 0.06,  $P < 0.01$ ) and high  
440 expansion (Table S5; expansion = 0.94,  $P < 0.01$ ). Niche differences between the core and  
441 invasion front were most apparent along environmental axes related to temperature of the  
442 warmest quarter and minimum temperature of the coldest month, rather than precipitation  
443 (Figure S4).

444

### 445 **Ecological niche model**

446 The model AUC (0.79) and sensitivity (0.75) metrics indicated moderately high  
447 discrimination and accuracy (Figure 6A). The variable response curves indicated the ENM was

448 not overspecified (Figure S5). The mean temperature of the warmest quarter constituted the  
449 most important variable for predicted habitat suitability (percent contribution = 81.5%;  
450 permutation importance = 67.8%) and warmer temperatures were largely associated with an  
451 increase in habitat suitability ( $R = 0.67$ ; Figure S6). The minimum temperature of the coldest  
452 month had the second highest importance (percent contribution = 11.2%; permutation  
453 importance = 17.9%) and was modestly associated with increased habitat suitability ( $R = 0.31$ ;  
454 Figure S6). Precipitation of the warmest quarter had the lowest importance (percent contribution  
455 = 7.3%; permutation importance = 14.3%) and was weakly correlated with habitat suitability ( $R =$   
456 0.02; Figure S6).

457 Populations from early versus late in invasion were distinct along the mean temperature  
458 of the warmest quarter axis with a disjunction at 20°C. This temperature also distinguished  
459 highly suitable from less suitable habitat in the ENM (Figure 6A & 6B).

460

#### 461 **Evolution of germination behavior during range expansion**

462 Populations from early versus late in invasion responded differently to temperature  
463 regimes (source geographic region x temperature regime interaction:  $P = 0.003$ ; Table S7;  
464 Figure 6C). Although linear contrasts between geographic regions did not differ significantly for  
465 any particular temperature treatment regime, there was a trend toward populations from late in  
466 invasion having a lower germination probability in the lower temperature treatments (Table S8).  
467 Germination probability increased with temperature for both geographic regions and plateaued  
468 ( $P < 0.001$ ; Table S7; Figure 6C).

469

#### 470 **Discussion**

471 Rapid evolution is increasingly recognized as an important process contributing to the  
472 range expansion of invasive species (Prentis et al. 2008; van Boheemen et al. 2019; Clements  
473 and Jones 2021). However, our understanding of the temporal and spatial scale over which

474 niche and trait divergence contribute to invasion at leading range edges remains unresolved.  
475 Our study took advantage of a well-documented invasion history to synthesize the  
476 consequences of recent range expansion for population genomic diversity, niche breadth, and  
477 germination behavior, a trait important in the colonization of new habitats. We found that leafy  
478 spurge populations experienced only modest losses in sequence diversity over the  
479 chronosequence of invasion. Range expansion involved climatic niche expansion and ecological  
480 niche models suggested that warm season temperature had the strongest influence on habitat  
481 suitability. Populations differentiated in germination behavior in response to temperature, with  
482 leading edge populations having increased dormancy at low temperatures. Our results suggest  
483 that evolution during range expansion may be important to consider in the development of  
484 models forecasting range shifts under current and future climates.

485         Loss of genetic diversity during range expansion may have fitness consequences and  
486 limit adaptive capacity (Lee 2002; Dlugosch and Parker 2008; Clements and Jones 2021). We  
487 found that range expansion was only accompanied by minimal losses in heterozygosity but no  
488 changes in inbreeding coefficient or the number of private alleles. Prevalent long-distance  
489 dispersal from the expanding core to the invasion front could reintroduce allelic variation lost  
490 due to bottlenecks in the colonization process. Historical data on leafy spurge range expansion  
491 suggests that long-distance, anthropogenic dispersal was likely occurring throughout the  
492 invasion process (Selleck et al., 1962; Dunn, 1979). Admixture among independent  
493 introductions could also contribute to within-population diversity, especially when there is  
494 genetic divergence between sources of introductions (Keller and Taylor 2008; Uller and Leimu  
495 2011). We observed some divergence in PCA space among several populations in or near the  
496 range core, with populations from the remainder of the range occupying intermediate PCA  
497 space. These patterns similarly suggest that gene flow has been substantial among populations  
498 despite introduction less than 140 years ago. Leafy spurge is an auto-allohexaploid, and the  
499 minor allele frequency spectrum revealed a peak at 0.33, indicating that homoeologous variants

500 could confound inferences. By filtering out variants with a minor allele frequency (MAF) > 0.26,  
501 we avoided the possibility of detecting spurious population structure, but we also lost some  
502 power given that some higher MAF variants may be truly allelic. As such, we believe that our  
503 approach was conservative, but not overly so, given the substantial biases that can arise in  
504 polyploid datasets.

505 In addition to gene flow during invasion, polyploidy may be an important factor  
506 influencing losses of genetic variation during colonization bottlenecks and the capacity for range  
507 expansion. Polyploids often maintain higher levels of genetic variation (Otto and Whitton 2000)  
508 and there is some evidence that phenotypic plasticity is greater in synthetically produced  
509 autopolyploids (Mattingly and Hovick 2023). These factors have been used to explain why  
510 polyploids may be better invaders than diploids (Pandit et al. 2011). Leafy spurge is an auto-  
511 allohexaploid, suggesting that its higher  $N_e$  should facilitate the maintenance of genetic diversity  
512 within populations and minimize divergence among them. Polyploidy has also been suggested  
513 to increase the capacity for adaptive evolution (Otto and Whitton 2000), which could also  
514 contribute to success as an invader. It is important to recognize that losses of diversity in DNA  
515 sequences do not necessarily translate to losses of variation in quantitative traits (Reed and  
516 Frankham 2001). Nevertheless, it is possible that polyploidy contributed to rapid invasion in  
517 leafy spurge, but more work is needed to distinguish the contribution of polyploidy from other  
518 factors.

519 Accumulating evidence suggests that invasive plant species frequently undergo climatic  
520 niche shifts during range expansion (Medley 2010; Atwater et al. 2018; van Boheemen et al.  
521 2019; Bates and Bertelsmeier 2021); but see (Petitpierre et al. 2012; Liu et al. 2020). Consistent  
522 with past findings, we observed climatic niche expansion throughout most of range expansion,  
523 except from the late expansion region to the invasion front. From an ENM, we found that warm  
524 season temperature had the strongest influence on habitat suitability and therefore may be one  
525 source of divergent selection from range core to invasion front. Of course, climate change has

526 already caused poleward shifts in plant species distributions through climatic niche matching  
527 (Parmesan 2006; Clements and Ditommaso 2011; Parmesan and Hanley 2015). Therefore,  
528 some range expansion may simply involve dispersal to already climatically suitable habitats.  
529 However, adaptation may be necessary for continued range expansion, especially where the  
530 species is already at its climatic niche limit (Clements and Ditommaso 2011). In leafy spurge,  
531 minimal range expansion has been observed in the last 30+ years and populations remain very  
532 small/low density at the invasion front, suggesting that populations have reached climatic niche  
533 limits. Moreover, ENMs suggest that invasion front populations have very low habitat suitability.  
534 Therefore, our results are inconsistent with the hypothesis that the leading edge is highly  
535 suitable but expansion is limited by dispersal. Instead, our results suggest that responses to  
536 divergent selection may be important for persistence at the leading range edge and for further  
537 range expansion.

538         Divergence in trait expression at a leading range edge can be driven by local adaptation,  
539 phenotypic plasticity, and/or maternal environmental effects (Des Roches et al. 2017;  
540 Westerband et al. 2021). Phenotypic plasticity is considered important during early stages of  
541 invasion because it allows introduced populations to establish in a broader range of  
542 environmental conditions (Sexton et al. 2002; Richards et al. 2006; Funk 2008; Lande 2015). In  
543 germination traits, plasticity could represent a means of habitat selection and niche construction  
544 (Donohue 2003, 2005) by which leafy spurge in the leading edge germinates optimally at the  
545 onset of spring conditions (warmer temperatures in northern latitudes). Likewise, rapid evolution  
546 during range expansion can result from selection on loci that influence dormancy and/or  
547 germination timing (Clements and Ditommaso 2011; Hodgins et al. 2018; Clements and Jones  
548 2021). We found increased dormancy at lower temperatures in leading edge populations. One  
549 possibility is that germination at colder temperatures exposes seedlings to more unpredictable  
550 environments (e.g., late season frost) and thus that selection favored germination later in the  
551 season for leafy spurge at its northern range limit. Interestingly, other work has suggested that

552 reduced dormancy evolves at leading range edges (Tabassum and Leishman 2018), contrary to  
553 our findings. Although warm season temperature is most strongly associated with habitat  
554 suitability and relevant to germination in leafy spurge, it is also possible that other variables  
555 influenced the evolution of germination behavior. Overall, our results suggest that range  
556 expansion involved niche expansion and that the evolution of germination timing may have been  
557 important in establishment at the leading range edge.

558         Early life history transitions are thought to be under strong selection because of their  
559 cascading effects on later life stages (Baskin and Baskin 1971; Marks and Prince 1981;  
560 Donohue 2002, 2005). In plant populations, the environmental conditions at the time of  
561 germination can alter the strength and direction of natural selection on postgermination traits  
562 (Donohue et al. 2010; D'Aguillo and Donohue 2023). In turn, this can affect the competitive  
563 environment, resource availability, and density-dependent selective agents experienced by  
564 populations (Donohue et al. 2010). While we did not investigate postgermination traits, it would  
565 be valuable to investigate whether germination timing in leafy spurge influences performance at  
566 later life history stages, especially in leading edge populations.

567         Our results suggest that even over the course of a fairly rapid invasion losses of  
568 genomic variation may be minimal. In leafy spurge, this may have occurred because of  
569 substantial gene flow during invasion and/or polyploidy. Regardless of the mechanism, higher  
570 levels of genetic variation can challenge management when genotypes vary in their responses  
571 to eradication measures (Gaskin et al. 2020). We also found that trait divergence may have  
572 contributed to climatic niche expansion and thus to the spatial extent of invasion. Forecasts of  
573 continued invasion typically rely on species distribution models (SDMs), which rarely take into  
574 account evolution. As such, models may fail to predict the complete extent of range expansion,  
575 or the severity of range infilling. Evolution-free SDMs are likely still valuable for management  
576 planning over meaningful spatial and temporal scales in many systems. However, in systems

577 where local adaptation is extensive, forecasts of range shifts with climate change may require  
 578 the construction of regional SDMs that account for evolution.

579

580

581

## 582 **Tables**

583 Table 1. Locality information and genetic diversity metrics (observed heterozygosity,  $H_o$ ;  
 584 inbreeding coefficient,  $G_{is}$ ; number of private alleles, and Tajima's D) for 14 leafy spurge  
 585 population samples from four phases of range expansion (see Figure 1).

| Range Position  | Population Genetic Samples | Latitude | Longitude | Observed Heterozygosity ( $H_o$ ) | Inbreeding Coefficient ( $G_{is}$ ) | Private Alleles | Tajima's D |
|-----------------|----------------------------|----------|-----------|-----------------------------------|-------------------------------------|-----------------|------------|
| Core            | Blue Earth                 | 44.16    | -94.09    | 0.068                             | 0.123                               | 27              | -0.037     |
|                 | Lyon                       | 44.33    | -95.82    | 0.067                             | -0.017                              | 9               | -0.020     |
|                 | Meeker                     | 44.94    | -94.64    | 0.07                              | -0.017                              | 4               | 0.205      |
| Early Expansion | Becker                     | 46.88    | -96.05    | 0.068                             | 0.116                               | 10              | -0.052     |
|                 | Big Stone                  | 45.52    | -96.55    | 0.067                             | 0.127                               | 9               | -0.028     |
|                 | Polk                       | 47.75    | -96.25    | 0.07                              | 0.097                               | 11              | -0.058     |
| Late Expansion  | Aitkin                     | 46.98    | -93.72    | 0.068                             | 0.138                               | 27              | 0.122      |
|                 | Anoka                      | 45.29    | -93.13    | 0.071                             | -0.026                              | 7               | 0.101      |
|                 | Crow Wing                  | 46.38    | -94.22    | 0.065                             | 0.081                               | 8               | 0.001      |
|                 | Winona                     | 44.04    | -91.62    | 0.071                             | 0.156                               | 42              | -0.167     |
| Invasion Front  | Duluth                     | 46.76    | -92.11    | 0.066                             | 0.12                                | 23              | -0.034     |
|                 | Koochiching                | 48.60    | -93.40    | 0.066                             | 0.089                               | 10              | -0.008     |
|                 | Pine                       | 46.04    | -92.36    | 0.069                             | 0.138                               | 21              | 0.000      |
|                 | St. Louis                  | 47.72    | -91.97    | 0.065                             | 0.046                               | 6               | 0.068      |

586

587



588 Table 2. Pairwise estimates of genetic differentiation measured as  $G_{st}$  for 14 leafy spurge  
 589 populations from four phases of range expansion (see Figure 1). Darker versus lighter shading  
 590 of cells indicates higher versus lower values of pairwise  $G_{st}$ .

|                 |             |       |        |        |           |       |        |       |           |        |        |             |       |           |  |
|-----------------|-------------|-------|--------|--------|-----------|-------|--------|-------|-----------|--------|--------|-------------|-------|-----------|--|
| Core            | Blue Earth  |       |        |        |           |       |        |       |           |        |        |             |       |           |  |
|                 | Lyon        | 0.176 |        |        |           |       |        |       |           |        |        |             |       |           |  |
|                 | Meeker      | 0.215 | 0.266  |        |           |       |        |       |           |        |        |             |       |           |  |
| Early Expansion | Becker      | 0.126 | 0.173  | 0.208  |           |       |        |       |           |        |        |             |       |           |  |
|                 | Big Stone   | 0.125 | 0.171  | 0.209  | 0.112     |       |        |       |           |        |        |             |       |           |  |
|                 | Polk        | 0.118 | 0.171  | 0.205  | 0.115     | 0.119 |        |       |           |        |        |             |       |           |  |
| Late Expansion  | Aitkin      | 0.124 | 0.187  | 0.216  | 0.126     | 0.127 | 0.127  |       |           |        |        |             |       |           |  |
|                 | Anoka       | 0.187 | 0.243  | 0.277  | 0.177     | 0.198 | 0.185  | 0.197 |           |        |        |             |       |           |  |
|                 | Crow Wing   | 0.134 | 0.188  | 0.219  | 0.116     | 0.128 | 0.126  | 0.136 | 0.201     |        |        |             |       |           |  |
|                 | Winona      | 0.084 | 0.134  | 0.181  | 0.081     | 0.084 | 0.081  | 0.095 | 0.153     | 0.096  |        |             |       |           |  |
| Invasion Front  | Duluth      | 0.126 | 0.163  | 0.203  | 0.110     | 0.116 | 0.118  | 0.128 | 0.179     | 0.124  | 0.080  |             |       |           |  |
|                 | Koochiching | 0.136 | 0.197  | 0.225  | 0.139     | 0.138 | 0.139  | 0.152 | 0.213     | 0.153  | 0.099  | 0.137       |       |           |  |
|                 | Pine        | 0.132 | 0.188  | 0.204  | 0.122     | 0.128 | 0.130  | 0.138 | 0.201     | 0.135  | 0.094  | 0.121       | 0.153 |           |  |
|                 | St. Louis   | 0.178 | 0.240  | 0.249  | 0.169     | 0.177 | 0.178  | 0.177 | 0.252     | 0.124  | 0.143  | 0.171       | 0.199 | 0.182     |  |
|                 | Blue Earth  | Lyon  | Meeker | Becker | Big Stone | Polk  | Aitkin | Anoka | Crow Wing | Winona | Duluth | Koochiching | Pine  | St. Louis |  |

591

592

593

594

595

596

597 Table 3. ANOVA testing for a relationship between four metrics of sequence diversity and  
598 geography (latitude, longitude, and their interaction) for 14 population samples. Bold indicates p-  
599 value less than 0.05.

600

| Model                | Heterozygosity (Ho) |      |              | Private Alleles |      |       | Tajima's D |      |       | Inbreeding (Gis) |      |       |
|----------------------|---------------------|------|--------------|-----------------|------|-------|------------|------|-------|------------------|------|-------|
|                      | Df                  | F    | P            | Df              | F    | P     | Df         | F    | P     | Df               | F    | P     |
| Latitude             | 1                   | 2.37 | 0.158        | 1               | 0.07 | 0.803 | 1          | 0.24 | 0.636 | 1                | 1.41 | 0.266 |
| Longitude            | 1                   | 0.48 | 0.506        | 1               | 1.29 | 0.285 | 1          | 1.22 | 0.298 | 1                | 0.04 | 0.846 |
| Latitude x Longitude | 1                   | 9.49 | <b>0.013</b> | 1               | 0.84 | 0.382 | 1          | 0.02 | 0.887 | 1                | 0.48 | 0.508 |

601

602

603

604

605

606

607

608

609

610

611 **Figures**

612 Figure 1. Map of the invasion history and tissue collection sites for 14 population samples and  
613 157 landscape samples of leafy spurge. The invasion history was derived from Hanson & Rudd  
614 (1933) and used to delineate four phases of invasion: core, early expansion, late expansion,  
615 and invasion front.

616  
617 Figure 2. Cluster assignment probability from STRUCTURE analyses ( $K = 3$ ) for population and  
618 landscape samples. Each bar represents one individual, and populations are separated by black  
619 lines.

620  
621 Figure 3. Principal components analysis (PCA) bi-plots for population genomic data from 14  
622 population samples ( $n = 6$  per population) and 157 landscape samples ( $n = 1$  per population).

623  
624 Figure 4. Isolation by distance (IBD) displayed as scatterplots of genetic distance versus  
625 geographic distance for A) population samples (A) and B-E) landscape samples (B-E). For  
626 landscape samples, we subset individuals for analyses by successive stages of invasion: B)  
627 range core (B), C) range core plus early expansion (C), D) range core, early, plus late  
628 expansion ranges (D), and E) all samples from across the four phases (E).

629  
630 Figure 5. Niche overlap during range expansion in climate niche space. The extent of the  
631 background environment is outlined in black (solid = total niche space; dashed = 90% of extent).  
632 A) Core (dark pink) versus early expansion (light pink), B) Early expansion (light pink) versus  
633 late expansion (beige), C) Late expansion (beige) versus invasion front (grey), D) Core (dark  
634 pink) versus invasion front (grey). In all panels, the arrow represents the direction of shift in the  
635 centroid of niche space.

636

637 Figure 6. Ecological Niche Model (ENM) habitat suitability projections for seed source  
638 populations and germination probability for source regions. A) Habitat suitability projection from  
639 leafy spurge ENM. Predicted habitat suitability ranges from 0 (purple) to 1 (yellow). The red line  
640 demarcates the boundary of 20°C for mean temperature of the warmest quarter. Seed source  
641 populations for the germination experiment are marked and colored yellow (>20°C) or purple  
642 (>20°C ) depending on their mean temperature of the warmest quarter. B) Variable response  
643 curve for the mean temperature of the warmest quarter. The vertical red bar denotes 20°C.  
644 Vertical yellow bars correspond to seed source populations from the warmer south and vertical  
645 purple bars correspond to source populations from the cooler north. C) Mean germination  
646 probability ( $\pm$  SE) by temperature treatment (X axis) for seed source regions. The warmer  
647 southern region is shown in yellow and the cooler northern region is shown in purple.

648

649

650

651

652

653

654

655

656

657

658

659

660

661

662

663 Figure 1.

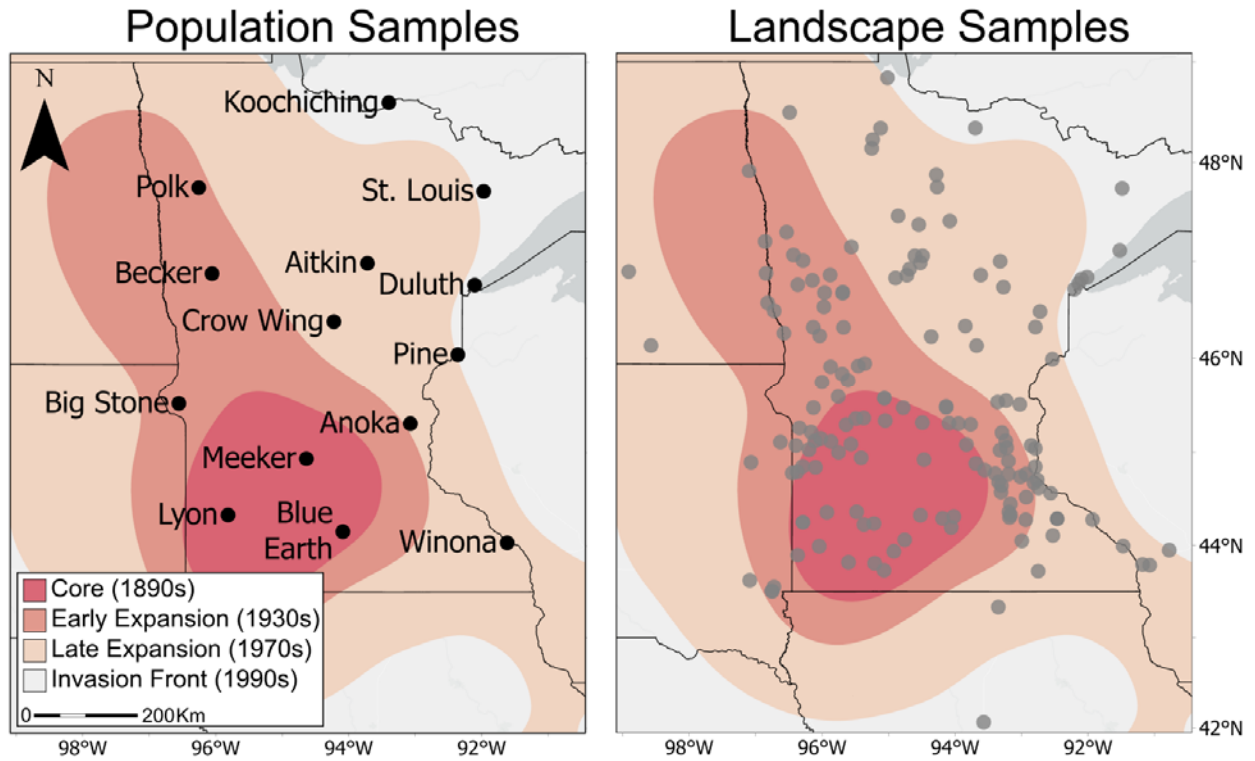

664

665

666

667

668

669

670

671

672

673

674



685 Figure 3.

686

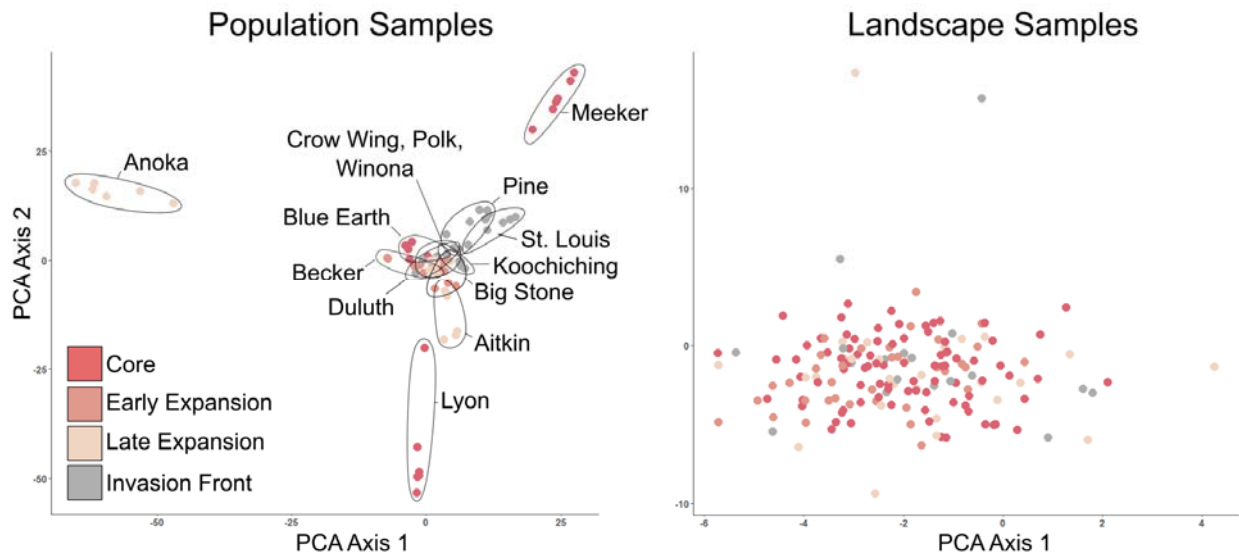

687

688

689

690

691

692

693

694

695

696

697

698

699

700

701 Figure 4.

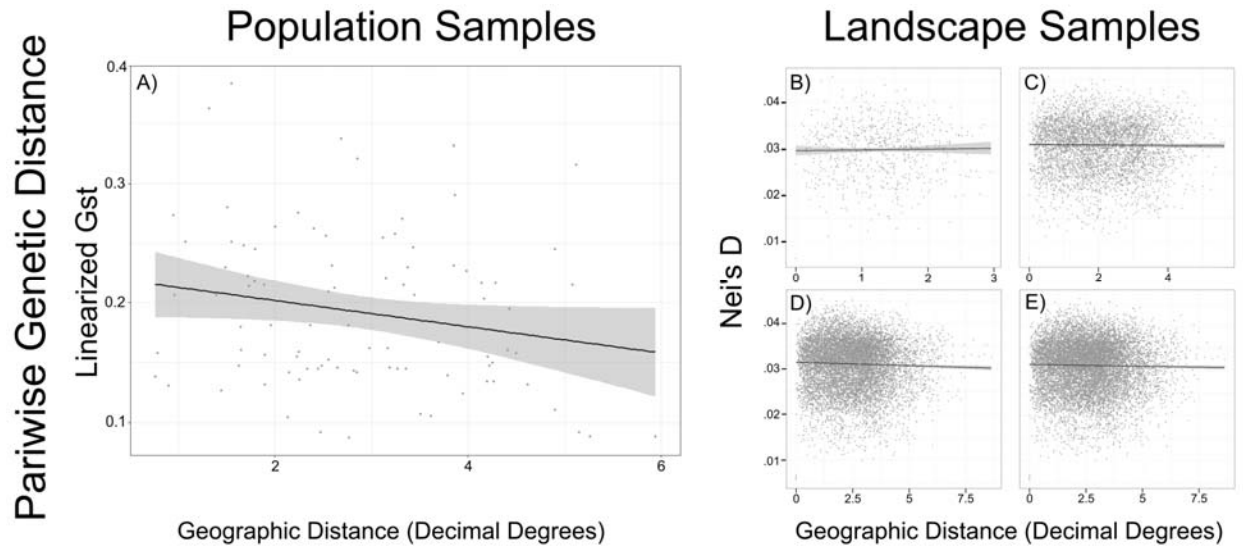

702

703

704

705

706

707

708

709

710

711

712

713

714



715 Figure 5.

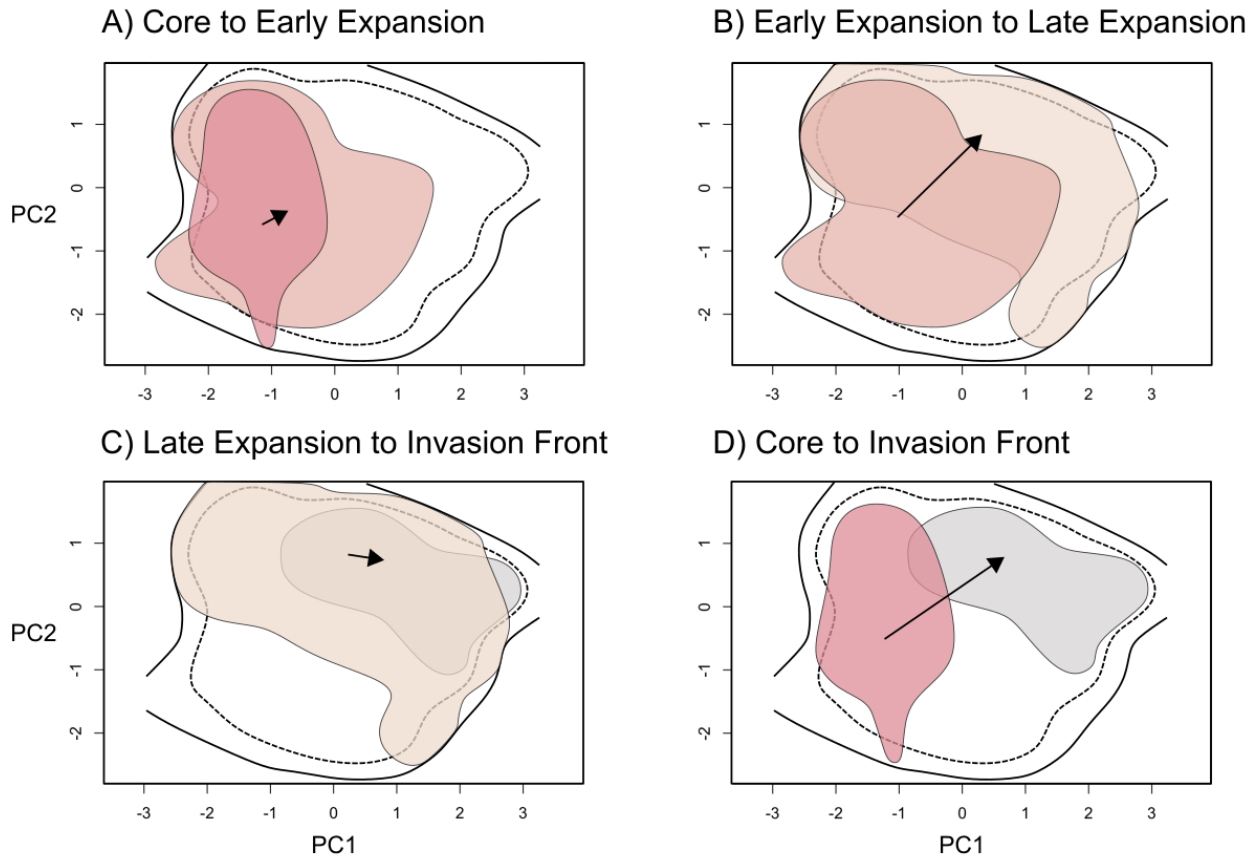

716

717

718

719

720

721

722

723

724

725

726

727

728 Figure 6.

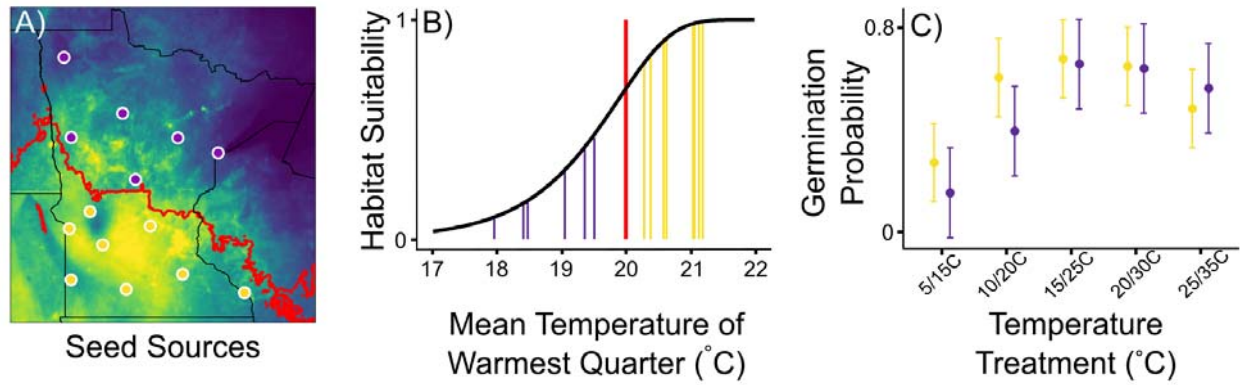

729

730

731

732

733

734

735

736

737

738

739

740

741

742

743

744 **Statements and Declarations**

745 Funding: Funding for this project was provided by the Minnesota Invasive Terrestrial Plants and  
746 Pests Center through the Environment and Natural Resources Trust Fund as recommended by  
747 the Legislative-Citizen Commission on Minnesota Resources (LCCMR). TAL was supported by  
748 the University of Minnesota Doctoral Dissertation Fellowship.

749  
750 Competing interests: The authors have no relevant financial or non-financial interests to  
751 disclose.

752  
753 Author contributions: All authors conceived of the study design, contributed to decisions  
754 throughout the analysis process, wrote, and edited the manuscript. T.A.L and R.B.R collected  
755 and analyzed data.

756  
757 Data Accessibility and Benefit-Sharing: All data will be made publicly available upon publication  
758 via the Dryad Digital Repository [DOI].

759

760

761 **References**

- 762 Araújo MB, Anderson RP, Márcia Barbosa A, et al (2019) Standards for distribution models in  
763 biodiversity assessments. *Sci Adv* 5:eaat4858
- 764 Atwater DZ, Ervine C, Barney JN (2018) Climatic niche shifts are common in introduced plants.  
765 *Nat Ecol Evol* 2:34–43
- 766 Austerlitz F, Jung-Muller B, Godelle B, Gouyon P-H (1997) Evolution of Coalescence Times,  
767 Genetic Diversity and Structure during Colonization. *Theor Popul Biol* 51:148–164
- 768 Bakke AL (1936) Leafy spurge, *Euphorbia esula* L. Iowa Agricultural Experiment Station  
769 189:209–245
- 770 Baniaga AE, Marx HE, Arrigo N, Barker MS (2020) Polyploid plants have faster rates of  
771 multivariate niche differentiation than their diploid relatives. *Ecol Lett* 23:68–78
- 772 Baskin JM, Baskin CC (1971) Germination of Winter Annuals in July and Survival of the  
773 Seedlings. *Bull Torrey Bot Club* 98:272–276
- 774 Bates OK, Bertelsmeier C (2021) Climatic niche shifts in introduced species. *Curr Biol*  
775 31:R1252–R1266
- 776 Batho G (1932) Leafy spurge. Department of Agriculture and Immigration Winnipeg, Canada  
777 106
- 778 Blaine Marchant D, Soltis DE, Soltis PS (2016) Patterns of abiotic niche shifts in allopolyploids  
779 relative to their progenitors. *New Phytol* 212:708–718
- 780 Bolger AM, Lohse M, Usadel B (2014) Trimmomatic: a flexible trimmer for Illumina sequence  
781 data. *Bioinformatics* 30:2114–2120
- 782 Brittingham HA, Koski MH, Ashman T-L (2018) Higher ploidy is associated with reduced range  
783 breadth in the Potentilleae tribe. *Am J Bot* 105:700–710
- 784 Brochmann C, Brysting AK, Alsos IG, et al (2004) Polyploidy in arctic plants. *Biol J Linn Soc*  
785 Lond 82:521–536
- 786 Capblancq T, Fitzpatrick MC, Bay RA, et al (2020) Genomic Prediction of (Mal)Adaptation  
787 Across Current and Future Climatic Landscapes. *Annu Rev Ecol Evol Syst* 51:245–269
- 788 Chao WS, Horvath DP, Anderson JV, Foley ME (2005) Potential model weeds to study  
789 genomics, ecology, and physiology in the 21st century. *Weed Sci* 53:929–937

- 790 Chapman DS, Scalone R, Štefanić E, Bullock JM (2017) Mechanistic species distribution  
791 modeling reveals a niche shift during invasion. *Ecology* 98:1671–1680
- 792 Chardon NI, Pironon S, Peterson ML, Doak DF (2020) Incorporating intraspecific variation into  
793 species distribution models improves distribution predictions, but cannot predict species  
794 traits for a wide-spread plant species. *Ecography* 43:60–74
- 795 Chown SL, Hodgins KA, Griffin PC, et al (2015) Biological invasions, climate change and  
796 genomics. *Evol Appl* 8:23–46
- 797 Clark LV, Lipka AE, Sacks EJ (2019) polyRAD: Genotype Calling with Uncertainty from  
798 Sequencing Data in Polyploids and Diploids. *G3* 9:663–673
- 799 Clark LV, Mays W, Lipka AE, Sacks EJ (2022) A population-level statistic for assessing  
800 Mendelian behavior of genotyping-by-sequencing data from highly duplicated genomes.  
801 *BMC Bioinformatics* 23:101
- 802 Clements DR, Ditommaso A (2011) Climate change and weed adaptation: can evolution of  
803 invasive plants lead to greater range expansion than forecasted? *Weed Res* 51:227–240
- 804 Clements DR, Jones VL (2021) Rapid evolution of invasive weeds under climate change:  
805 Present evidence and future research needs. *Front Agron* 3:664034
- 806 Colautti RI, Barrett SCH (2013) Rapid Adaptation to Climate Facilitates Range Expansion of an  
807 Invasive Plant. *Science* 342:364–366
- 808 Colautti RI, Lau JA (2015) Contemporary evolution during invasion: evidence for differentiation,  
809 natural selection, and local adaptation. *Mol Ecol* 24:1999–2017
- 810 Collart F, Hedenäs L, Broennimann O, et al (2020) Intraspecific differentiation: Implications for  
811 niche and distribution modelling. *J Biogeogr* 48:415–426
- 812 D’Aguillo M, Donohue K (2023) Changes in phenology can alter patterns of natural selection:  
813 the joint evolution of germination time and postgermination traits. *New Phytol.*  
814 <https://doi.org/10.1111/nph.18711>
- 815 Des Roches S, Turley NE, Bailey JK, et al (2017) The ecological importance of intraspecific  
816 variation. *Nature Ecology & Evolution* 2:57–64
- 817 Di Cola V, Broennimann O, Petitpierre B, et al (2017) ecospat: an R package to support spatial  
818 analyses and modeling of species niches and distributions. *Ecography* 40:774–787
- 819 Dixon AL, Busch JW (2017) Common garden test of range limits as predicted by a species  
820 distribution model in the annual plant *Mimulus bicolor*. *Am J Bot* 104:817–827
- 821 Dlugosch KM, Parker IM (2008) Founding events in species invasions: genetic variation,  
822 adaptive evolution, and the role of multiple introductions. *Mol Ecol* 17:431–449
- 823 Donohue K (2003) Setting the Stage: Phenotypic Plasticity as Habitat Selection. *Int J Plant Sci*  
824 164:S79–S92
- 825 Donohue K (2005) Niche construction through phenological plasticity: life history dynamics and  
826 ecological consequences. *New Phytol* 166:83–92
- 827 Donohue K (2002) Germination timing influences natural selection on life-history characters in  
828 *Arabidopsis Thaliana*. *Ecology* 83:1006–1016
- 829 Donohue K, Rubio de Casas R, Burghardt L, et al (2010) Germination, Postgermination  
830 Adaptation, and Species Ecological Ranges. *Annu Rev Ecol Evol Syst* 41:293–319
- 831 Dufresne F, Stift M, Vergilino R, Mable BK (2014) Recent progress and challenges in population  
832 genetics of polyploid organisms: an overview of current state-of-the-art molecular and  
833 statistical tools. *Mol Ecol* 23:40–69
- 834 Duncan CA, Jachetta JJ, Brown ML, et al (2004) Assessing the Economic, Environmental, and  
835 Societal Losses from Invasive Plants on Rangeland and Wildlands. *Weed Technol*  
836 18:1411–1416
- 837 Dunn PH (1985) Origins of leafy spurge in North America. In: Watson AK (ed) Number 3 of the  
838 monograph series of the weed science society of America. Champaign, IL, pp 7–13
- 839 Dunn PH (1979) The Distribution of Leafy Spurge (*Euphorbia esula*) and Other Weedy  
840 *Euphorbia* spp. in the United States. *Weed Sci* 27:509–516

- 841 Earl DA, vonHoldt BM (2012) STRUCTURE HARVESTER: a website and program for  
842 visualizing STRUCTURE output and implementing the Evanno method. *Conserv Genet*  
843 *Resour* 4:359–361
- 844 Elith J, Leathwick JR (2009) Species Distribution Models: Ecological Explanation and Prediction  
845 Across Space and Time. *Annu Rev Ecol Evol Syst* 40:677–697
- 846 Evanno G, Regnaut S, Goudet J (2005) Detecting the number of clusters of individuals using  
847 the software STRUCTURE: a simulation study. *Mol Ecol* 14:2611–2620
- 848 Excoffier L (2004) Patterns of DNA sequence diversity and genetic structure after a range  
849 expansion: lessons from the infinite-island model. *Mol Ecol* 13:853–864
- 850 Excoffier L, Ray N (2008) Surfing during population expansions promotes genetic revolutions  
851 and structuration. *Trends Ecol Evol* 23:347–351
- 852 Excoffier L, Smouse PE, Quattro JM (1992) Analysis of molecular variance inferred from metric  
853 distances among DNA haplotypes: application to human mitochondrial DNA restriction  
854 data. *Genetics* 131:479–491
- 855 Funk JL (2008) Differences in Plasticity between Invasive and Native Plants from a Low  
856 Resource Environment. *J Ecol* 96:1162–1173
- 857 Gaskin JF, Espeland E, Johnson CD, et al (2020) Managing invasive plants on Great Plains  
858 grasslands: A discussion of current challenges. *Rangeland Ecol Manage*.  
859 <https://doi.org/10.1016/j.rama.2020.04.003>
- 860 Gerard D, Ferrão LFV (2020) Priors for genotyping polyploids. *Bioinformatics* 36:1795–1800
- 861 Glennon KL, Ritchie ME, Segraves KA (2014) Evidence for shared broad-scale climatic niches  
862 of diploid and polyploid plants. *Ecol Lett* 17:574–582
- 863 Goodsman DW, Cooke B, Coltman DW, Lewis MA (2014) The genetic signature of rapid range  
864 expansions: How dispersal, growth and invasion speed impact heterozygosity and allele  
865 surfing. *Theor Popul Biol* 98:1–10
- 866 Gorton AJ, Tiffin P, Moeller DA (2019) Does adaptation to historical climate shape plant  
867 responses to future rainfall patterns? A rainfall manipulation experiment with common  
868 ragweed. *Oecologia* 190:941–953
- 869 Hanson HC, Rudd VE (1933) Leafy spurge: Life history and habits. *North Dakota Agricultural*  
870 *College Experiment Station Bulletin* 1–24
- 871 Hein DG, Miller SD (1992) Influence of leafy spurge on forage utilization by cattle. *J Range*  
872 *Manage* 45:405
- 873 Hijmans R, Phillips S, Leathwick J, Elith J (2022) dismo: Species Distribution Modeling. Version  
874 1.3-9URL <https://cran.r-project.org/web/packages/dismo/index.html>
- 875 Hodgins KA, Bock DG, Rieseberg LH (2018) Trait Evolution in Invasive Species. *Annual Plant*  
876 *Reviews online* 459–496
- 877 Horvath D, Anderson JV, Chao WS, et al (2015) Leafy Spurge Genomics: A Model Perennial  
878 Weed to Investigate Development, Stress Responses, and Invasiveness. In: Sablok G,  
879 Kumar S, Ueno S, et al. (eds) *Advances in the Understanding of Biological Sciences*  
880 *Using Next Generation Sequencing (NGS) Approaches*. Springer International  
881 Publishing, Cham, pp 63–78
- 882 Horvath DP, Patel S, Dođramaci M, et al (2018) Gene Space and Transcriptome Assemblies of  
883 Leafy Spurge (*Euphorbia esula*) Identify Promoter Sequences, Repetitive Elements,  
884 High-Quality Markers, and a Full-Length Chloroplast Genome. *Weed Sci* 66:355–367
- 885 Hutchison DW, Templeton AR (1999) Correlation of pairwise genetic and geographic distance  
886 measures: inferring the relative influences of gene flow and drift on the distribution of  
887 genetic variability. *Evolution* 53:1898–1914
- 888 Jombart T (2008) adegenet: a R package for the multivariate analysis of genetic markers.  
889 *Bioinformatics* 24:1403–1405
- 890 Kamvar ZN, Brooks JC, Grünwald NJ (2015) Novel R tools for analysis of genome-wide  
891 population genetic data with emphasis on clonality. *Front Genet* 6:208



- 892 Keller SR, Taylor DR (2008) History, chance and adaptation during biological invasion:  
893 separating stochastic phenotypic evolution from response to selection. *Ecol Lett* 11:852–  
894 866
- 895 Klopstein S, Currat M, Excoffier L (2006) The fate of mutations surfing on the wave of a range  
896 expansion. *Mol Biol Evol* 23:482–490
- 897 Koski MH, Layman NC, Prior CJ, et al (2019) Selfing ability and drift load evolve with range  
898 expansion. *Evol Lett* 3:500–512
- 899 Lacey JR, Wallander R, Olson-Rutz K (1992) Recovery, Germinability, and Viability of Leafy  
900 Spurge (*Euphorbia esula*) Seeds Ingested by Sheep and Goats. *Weed Technol* 6:599–  
901 602
- 902 Lachmuth S, Durka W, Schurr FM (2010) The making of a rapid plant invader: genetic diversity  
903 and differentiation in the native and invaded range of *Senecio inaequidens*. *Mol Ecol*  
904 19:3952–3967
- 905 Lake TA, Briscoe Runquist RD, Moeller DA (2020) Predicting range expansion of invasive  
906 species: Pitfalls and best practices for obtaining biologically realistic projections. *Divers*  
907 *Distrib* 24:348
- 908 Lakela O (1965) *A Flora of Northeastern Minnesota*, NED-New edition. University of Minnesota  
909 Press
- 910 Lande R (2015) Evolution of phenotypic plasticity in colonizing species. *Mol Ecol* 24:2038–2045
- 911 Lee CE (2002) Evolutionary genetics of invasive species. *Trends Ecol Evol* 17:386–391
- 912 Lehe R, Hallatschek O, Peliti L (2012) The rate of beneficial mutations surfing on the wave of a  
913 range expansion. *PLoS Comput Biol* 8:e1002447
- 914 Liu C, Wolter C, Xian W, Jeschke JM (2020) Most invasive species largely conserve their  
915 climatic niche. *Proc Natl Acad Sci USA* 117:23643–23651
- 916 Lym RG (1998) The Biology and Integrated Management of Leafy Spurge (*Euphorbia esula*) on  
917 North Dakota Rangeland. *Weed Technol* 12:367–373
- 918 Lym RG, Kirby DR (1987) Cattle Foraging Behavior in Leafy Spurge (*Euphorbia esula*)-Infested  
919 Rangeland. *Weed Technol* 1:314–318
- 920 Ma L, Cao L-J, Hoffmann AA, et al (2020) Rapid and strong population genetic differentiation  
921 and genomic signatures of climatic adaptation in an invasive mealybug. *Divers Distrib*  
922 26:610–622
- 923 Marks M, Prince S (1981) Influence of Germination Date on Survival and Fecundity in Wild  
924 Lettuce *Lactuca Serriola*. *Oikos* 36:326–330
- 925 Mathias A, Kisdi E (2002) Adaptive diversification of germination strategies. *Proc Biol Sci*  
926 269:151–155
- 927 Mattingly KZ, Hovick SM (2023) Autopolyploids of *Arabidopsis thaliana* are more phenotypically  
928 plastic than their diploid progenitors. *Ann Bot* 131:45–58
- 929 Medley KA (2010) Niche shifts during the global invasion of the Asian tiger mosquito, *Aedes*  
930 *albopictus* Skuse (Culicidae), revealed by reciprocal distribution models. *Glob Ecol*  
931 *Biogeogr* 19:122–133
- 932 Meirmans PG (2020) genodive version 3.0: Easy-to-use software for the analysis of genetic  
933 data of diploids and polyploids. *Mol Ecol Resour* 20:1126–1131
- 934 Meirmans PG (2012) AMOVA-based clustering of population genetic data. *J Hered* 103:744–  
935 750
- 936 Meirmans PG, Liu S, van Tienderen PH (2018) The Analysis of Polyploid Genetic Data. *J Hered*  
937 109:283–296
- 938 Melbourne BA, Hastings A (2009) Highly variable spread rates in replicated biological invasions:  
939 fundamental limits to predictability. *Science* 325:1536–1539
- 940 Merow C, Smith MJ, Silander JA Jr (2013) A practical guide to MaxEnt for modeling species'  
941 distributions: what it does, and why inputs and settings matter. *Ecography* 36:1058–1069

- 942 Moody ME, Mueller LD, Soltis DE (1993) Genetic variation and random drift in autotetraploid  
943 populations. *Genetics* 134:649–657
- 944 Moran EV, Reid A, Levine JM (2017) Population genetics and adaptation to climate along  
945 elevation gradients in invasive *Solidago canadensis*. *PLoS One* 12:e0185539
- 946 Morente-López J, Kass JM, Lara-Romero C, et al (2022) Linking ecological niche models and  
947 common garden experiments to predict phenotypic differentiation in stressful  
948 environments: Assessing the adaptive value of marginal populations in an alpine plant.  
949 *Glob Chang Biol* 28:4143–4162
- 950 Morrow AL (1979) Studies on the Reproductive Biology of Leafy Spurge (*Euphorbia esula*).  
951 *Weed Sci* 27:106–109
- 952 Nei M (1972) Genetic Distance between Populations. *Am Nat* 106:283–292
- 953 Nei M, Maruyama T, Chakraborty R (1975) THE BOTTLENECK EFFECT AND GENETIC  
954 VARIABILITY IN POPULATIONS. *Evolution* 29:1–10
- 955 Oduor AMO, Leimu R, van Kleunen M (2016) Invasive plant species are locally adapted just as  
956 frequently and at least as strongly as native plant species. *J Ecol* 104:957–968
- 957 Otto SP, Whitton J (2000) Polyploid incidence and evolution. *Annu Rev Genet* 34:401–437
- 958 Pandit MK, Pockock MJO, Kunin WE (2011) Ploidy influences rarity and invasiveness in plants. *J*  
959 *Ecol* 99:1108–1115
- 960 Parmesan C (2006) Ecological and Evolutionary Responses to Recent Climate Change. *Annu*  
961 *Rev Ecol Evol Syst* 37:637–669
- 962 Parmesan C, Hanley ME (2015) Plants and climate change: complexities and surprises. *Ann*  
963 *Bot* 116:849–864
- 964 Peischl S, Dupanloup I, Kirkpatrick M, Excoffier L (2013) On the accumulation of deleterious  
965 mutations during range expansions. *Mol Ecol* 22:5972–5982
- 966 Pemberton RW (1988) Myrmecochory in the Introduced Range Weed, Leafy Spurge (*Euphorbia*  
967 *esula* L.). *Am Midl Nat* 119:431–435
- 968 Peter BM, Slatkin M (2013) Detecting range expansions from genetic data. *Evolution* 67:3274–  
969 3289
- 970 Petitpierre B, Broennimann O, Kueffer C, et al (2017) Selecting predictors to maximize the  
971 transferability of species distribution models: lessons from cross-continental plant  
972 invasions: Which predictors increase the transferability of SDMs? *Glob Ecol Biogeogr*  
973 26:275–287
- 974 Petitpierre B, Kueffer C, Broennimann O, et al (2012) Climatic niche shifts are rare among  
975 terrestrial plant invaders. *Science* 335:1344–1348
- 976 Phillips SJ, Anderson RP, Dudík M, et al (2017) Opening the black box: an open-source release  
977 of Maxent. *Ecography* 40:887–893
- 978 Phillips SJ, Dudík M (2008) Modeling of species distributions with Maxent: new extensions and  
979 a comprehensive evaluation. *Ecography* 31:161–175
- 980 Pina-Martins F, Silva DN, Fino J, Paulo OS (2017) Structure\_threader: An improved method for  
981 automation and parallelization of programs structure, fastStructure and Maverick on  
982 multicore CPU systems. *Mol Ecol Resour* 17:e268–e274
- 983 Prentis PJ, Wilson JRU, Dormontt EE, et al (2008) Adaptive evolution in invasive species.  
984 *Trends Plant Sci* 13:288–294
- 985 Pritchard JK, Stephens M, Donnelly P (2000) Inference of population structure using multilocus  
986 genotype data. *Genetics* 155:945–959
- 987 Reed DH, Frankham R (2001) How closely correlated are molecular and quantitative measures  
988 of genetic variation? A meta-analysis. *Evolution* 55:1095–1103
- 989 Rice A, Šmarda P, Novosolov M, et al (2019) The global biogeography of polyploid plants.  
990 *Nature Ecology & Evolution* 3:265–273
- 991 Richards CL, Bossdorf O, Muth NZ, et al (2006) Jack of all trades, master of some? On the role  
992 of phenotypic plasticity in plant invasions. *Ecol Lett* 9:981–993

- 993 Riina R, Peirson JA, Geltman DV, et al (2013) A worldwide molecular phylogeny and  
994 classification of the leafy spurges, *Euphorbia* subgenus *Esula* (Euphorbiaceae). *Taxon*  
995 62:316–342
- 996 Rochette NC, Rivera-Colón AG, Catchen JM (2019) Stacks 2: Analytical methods for paired-end  
997 sequencing improve RADseq-based population genomics. *Mol Ecol* 28:4737–4754
- 998 Ronfort J, Jenczewski E, Bataillon T, Rousset F (1998) Analysis of population structure in  
999 autotetraploid species. *Genetics* 150:921–930
- 1000 Rozas J, Ferrer-Mata A, Sánchez-DelBarrio JC, et al (2017) DnaSP 6: DNA Sequence  
1001 Polymorphism Analysis of Large Data Sets. *Mol Biol Evol* 34:3299–3302
- 1002 Rutland CA, Hall ND, McElroy JS (2021) The Impact of Polyploidization on the Evolution of  
1003 Weed Species: Historical Understanding and Current Limitations. *Frontiers in Agronomy*  
1004 3:626454
- 1005 Sakai AK, Allendorf FW, Holt JS, et al (2001) The Population Biology of Invasive Species. *Annu*  
1006 *Rev Ecol Syst* 32:305–332
- 1007 Schulz-Schaeffer, Gerhardt (1989) Cytotaxonomic analysis of the *euphorbia* spp leafy spurge  
1008 complex ii. comparative study of the chromosome morphology. *Biol Zent BI* 108:69–76
- 1009 Searcy CA, Shaffer HB (2016) Do Ecological Niche Models Accurately Identify Climatic  
1010 Determinants of Species Ranges? *Am Nat* 187:423–435
- 1011 Selechnik D, Richardson MF, Shine R, et al (2019) Increased Adaptive Variation Despite  
1012 Reduced Overall Genetic Diversity in a Rapidly Adapting Invader. *Front Genet* 10:1221
- 1013 Selleck GW, Coupland RT, Frankton C (1962) Leafy spurge in Saskatchewan. *Ecol Monogr*  
1014 32:1–29
- 1015 Sexton JP, McKay JK, Sala A (2002) Plasticity and Genetic Diversity May Allow Saltcedar to  
1016 Invade Cold Climates in North America. *Ecol Appl* 12:1652–1660
- 1017 Singmann H, Bolker B, Westfall J, F. A (2016) afex: Analysis of Factorial Experiments. Version  
1018 0.16-1 URL <https://CRAN.R-project.org/package=afex>
- 1019 Slatkin M (1987) Gene flow and the geographic structure of natural populations. *Science*  
1020 236:787–792
- 1021 Slatkin M (1993) Isolation by Distance in Equilibrium and Non-Equilibrium Populations.  
1022 *Evolution* 47:264–279
- 1023 Slatkin M, Excoffier L (2012) Serial founder effects during range expansion: a spatial analog of  
1024 genetic drift. *Genetics* 191:171–181
- 1025 Soltis PS, Soltis DE (2000) The role of genetic and genomic attributes in the success of  
1026 polyploids. *Proc Natl Acad Sci U S A* 97:7051–7057
- 1027 Suarez AV, Tsutsui ND (2008) The evolutionary consequences of biological invasions. *Mol Ecol*  
1028 17:351–360
- 1029 Sullivan LL, Li B, Miller TEX, et al (2017) Density dependence in demography and dispersal  
1030 generates fluctuating invasion speeds. *Proc Natl Acad Sci USA* 114:5053–5058
- 1031 Tabassum S, Leishman MR (2018) Have your cake and eat it too: greater dispersal ability and  
1032 faster germination towards range edges of an invasive plant species in eastern Australia.  
1033 *Biol Invasions* 20:1199–1210
- 1034 Tajima F (1989) Statistical method for testing the neutral mutation hypothesis by DNA  
1035 polymorphism. *Genetics* 123:585–595
- 1036 te Beest M, Le Roux JJ, Richardson DM, et al (2012) The more the better? The role of  
1037 polyploidy in facilitating plant invasions. *Ann Bot* 109:19–45
- 1038 Travis JMJ, Mynard P, Bocedi G (2021) Evolution of reduced dormancy during range  
1039 expansions. *bioRxiv* 2021.10.11.463894
- 1040 Treier UA, Broennimann O, Normand S, et al (2009) Shift in cytotype frequency and niche  
1041 space in the invasive plant *Centaurea maculosa*. *Ecology* 90:1366–1377
- 1042 Uller T, Leimu R (2011) Founder events predict changes in genetic diversity during human-  
1043 mediated range expansions. *Glob Chang Biol* 17:3478–3485



- 1044 van Boheemen LA, Atwater DZ, Hodgins KA (2019) Rapid and repeated local adaptation to  
1045 climate in an invasive plant. *New Phytol* 222:614–627
- 1046 Van de Peer Y, Ashman T-L, Soltis PS, Soltis DE (2021) Polyploidy: an evolutionary and  
1047 ecological force in stressful times. *Plant Cell* 33:11–26
- 1048 Verma P, Majee M (2013) Seed germination and viability test in tetrazolium (TZ) assay. *Bio*  
1049 *Protoc* 3:1–4
- 1050 Wang D, Xu X, Zhang H, et al (2022) Abiotic Niche Divergence of Hybrid Species from Their  
1051 Progenitors. *Am Nat* 200:634–645
- 1052 Warren DL, Glor RE, Turelli M (2008) Environmental niche equivalency versus conservatism:  
1053 quantitative approaches to niche evolution. *Evolution* 62:2868–2883
- 1054 Welles SR, Dlugosch KM (2019) Population Genomics of Colonization and Invasion. In: Rajora  
1055 OP (ed) *Population Genomics: Concepts, Approaches and Applications*. Springer  
1056 International Publishing, Cham, pp 655–683
- 1057 West NM, Gaskin JF, Milan J, Rand TA (2023) High genetic diversity in the landscape suggests  
1058 frequent seedling recruitment by *Euphorbia virgata* Waldst. & Kit. (leafy spurge) in the  
1059 northern U.S.A. *Biol Invasions* 25:645–652
- 1060 Westerband AC, Funk JL, Barton KE (2021) Intraspecific trait variation in plants: a renewed  
1061 focus on its role in ecological processes. *Ann Bot* 127:397–410
- 1062 Wicks GA, Derscheid LA (1958) Leafy spurge seed maturation studies. *Proc North Cent Weed*  
1063 *Control Conf*
- 1064 Williams JL, Kendall BE, Levine JM (2016) Rapid evolution accelerates plant population spread  
1065 in fragmented experimental landscapes. *Science* 353:482–485
- 1066 Wolkovich EM, Davies TJ, Schaefer H, et al (2013) Temperature-dependent shifts in phenology  
1067 contribute to the success of exotic species with climate change. *Am J Bot* 100:1407–  
1068 1421
- 1069 Woods EC, Sultan SE (2022) Post-introduction evolution of a rapid life-history strategy in a  
1070 newly invasive plant. *Ecology* 103:e3803
- 1071 Wright S (1943) Isolation by Distance. *Genetics* 28:114–138
- 1072
